# Supplementary material for: Spatiotemporal Dynamics of CO2 Emissions in China Based on Multivariate Spatial Statistics
Source: MDPI journal article supplement (doi:10.3390/atmos15050538), 2024-04-28
Supplement: s1 [file s1]

**Table S1. Table of rotated component matrices.**

| <b>Variant</b> | <b>1</b> | <b>2</b> | <b>3</b> | <b>4</b> | <b>5</b> | <b>6</b> | <b>7</b> | <b>8</b> | <b>9</b> | <b>10</b> |
|----------------|----------|----------|----------|----------|----------|----------|----------|----------|----------|-----------|
| SUM-NPP-VIIRS  | 0.964    |          |          |          |          |          |          |          |          |           |
| SUM-GDP        | 0.903    |          |          |          |          |          |          |          |          |           |
| SUM-人口         | 0.796    |          |          |          |          |          |          |          |          |           |
| SUM-NDVI       |          |          |          | 0.913    |          |          |          |          |          |           |
| NDVI-1to7      |          |          |          | 0.783    |          |          |          |          |          |           |
| NDVI-8         |          |          |          | 0.851    |          |          |          |          |          |           |
| NDVI-9         |          |          |          | 0.827    |          |          |          |          |          |           |
| NDVI-10        |          |          |          |          |          |          |          | 0.668    |          |           |
| NDVI-11        |          |          |          |          |          |          | 0.940    |          |          |           |
| NDVI-12        |          |          |          |          |          | -0.740   |          |          |          |           |
| NDVI-13        | 0.878    |          |          |          |          |          |          |          |          |           |
| NDVI-14        |          |          | 0.936    |          |          |          |          |          |          |           |
| NDVI-15        |          | -0.979   |          |          |          |          |          |          |          |           |
| NDVI-16        |          | 0.973    |          |          |          |          |          |          |          |           |
| NDVI-17        |          |          |          |          |          |          | 0.755    |          |          |           |
| NPP-VIIRS-1to7 |          |          |          |          | 0.514    |          |          |          |          |           |
| NPP-VIIRS-8    |          |          |          |          | 0.892    |          |          |          |          |           |
| NPP-VIIRS-9    |          |          |          |          |          |          |          |          |          |           |
| NPP-VIIRS-10   |          |          |          |          |          |          |          | 0.858    |          |           |
| NPP-VIIRS-11   |          |          |          |          |          |          |          |          | 0.580    |           |
| NPP-VIIRS-12   |          |          |          |          |          | -0.683   |          |          |          |           |
| NPP-VIIRS-13   | 0.965    |          |          |          |          |          |          |          |          |           |
| NPP-VIIRS-14   |          |          | 0.752    |          |          |          |          |          |          |           |
| NPP-VIIRS-15   |          | 0.983    |          |          |          |          |          |          |          |           |
| NPP-VIIRS-16   |          | 0.989    |          |          |          |          |          |          |          |           |
| NPP-VIIRS-17   | 0.763    |          |          |          |          |          |          |          |          |           |

**Table S2. Subsumption of carbon emission independent variables on land classification.**

| <b>Variables</b> | <b>Encodings</b> | <b>Land Type</b> | <b>Variables</b> | <b>Encodings</b> | <b>Land Type</b> |
|------------------|------------------|------------------|------------------|------------------|------------------|
| forestland       | 1                | evergreen        | -                | 10               | grasslands       |

| Variables  | Encodings | Land Type                     | Variables | Encodings | Land Type                               |
|------------|-----------|-------------------------------|-----------|-----------|-----------------------------------------|
|            |           | coniferous forest             |           |           |                                         |
|            | 2         | evergreen broad-leaved forest | -         | 11        | permanent wetland                       |
|            | 3         | deciduous-coniferous forest   |           | 12        | cropland                                |
|            | 4         | deciduous broad-leaved forest | farmland  | 14        | Farmland and natural vegetation mosaics |
|            | 5         | mixed forests                 | urban     | 13        | urban built-up area                     |
|            | 6         | closed shrubbery              | -         | 15        | snowfields                              |
|            | 7         | brushwood                     | -         | 16        | bare ground                             |
| grasslands | 8         | wooded grassland              | water     | 17        | water                                   |
|            | 9         | savanna                       |           |           |                                         |

**Table S3. Correlation analysis of initially screened independent variables.**

| Variables     | VIF    | Variables         | VIF    |
|---------------|--------|-------------------|--------|
| SUM-GDP       | 12.146 | NDVI-13           | 5.785  |
| SUM-人口        | 7.517  | NDVI-17           | 1.193  |
| SUM-NDVI      | 5.859  | NPP-VIIRS-1to7    | 2.104  |
| SUM-NPP-VIIRS | 34.727 | NPP-VIIRS-8to9    | 3.330  |
| NDVI-1to7     | 2.830  | NPP-VIIRS-12and14 | 3.853  |
| NDVI-8to9     | 4.838  | NPP-VIIRS-13      | 32.825 |
| NDVI-12and14  | 2.769  | NPP-VIIRS-17      | 2.245  |

SUM-NPP-VIIRS denotes the sum of NPP-VIIRS, and the rest is the same; NDVI-1to7 denotes the NDVI of the merged land classes 1 to 7, and the rest is the same.

**Table S4. Parameter table of provincial SLM regression coefficients for 2021.**

| Variables           | regression<br>coefficient <sup>a</sup> | standard<br>error <sup>a</sup> | regression<br>coefficient <sup>b</sup> | standard<br>error <sup>b</sup> |
|---------------------|----------------------------------------|--------------------------------|----------------------------------------|--------------------------------|
| W_carbon            | 0.740                                  | 0.000                          | 0.984                                  | 0.000                          |
| CONSTANT            | 0.013                                  | 0.000                          | -0.002                                 | 0.000                          |
| SUM-GDP             | -0.009                                 | 0.001                          | -0.001                                 | 0.000                          |
| NDVI-L <sub>1</sub> | -0.008                                 | 0.001                          | -0.002                                 | 0.000                          |
| NDVI-L <sub>3</sub> | 0.059                                  | 0.001                          | 0.003                                  | 0.000                          |

| Variables                | regression               | standard           | regression               | standard           |
|--------------------------|--------------------------|--------------------|--------------------------|--------------------|
|                          | coefficient <sup>a</sup> | error <sup>a</sup> | coefficient <sup>b</sup> | error <sup>b</sup> |
| NDVI-L <sub>4</sub>      | 0.120                    | 0.005              | 0.011                    | 0.000              |
| SUM-NDVI                 | 0.040                    | 0.001              | 0.007                    | 0.000              |
| NPP-VIIRS-L <sub>1</sub> | 0.015                    | 0.002              | 0.005                    | 0.000              |
| NPP-VIIRS-L <sub>2</sub> | 0.000                    | 0.000              | 0.000                    | 0.000              |
| SUM-NPP-VIIRS            | 0.003                    | 0.000              | 0.001                    | 0.000              |

a: provincial data, b: municipal data

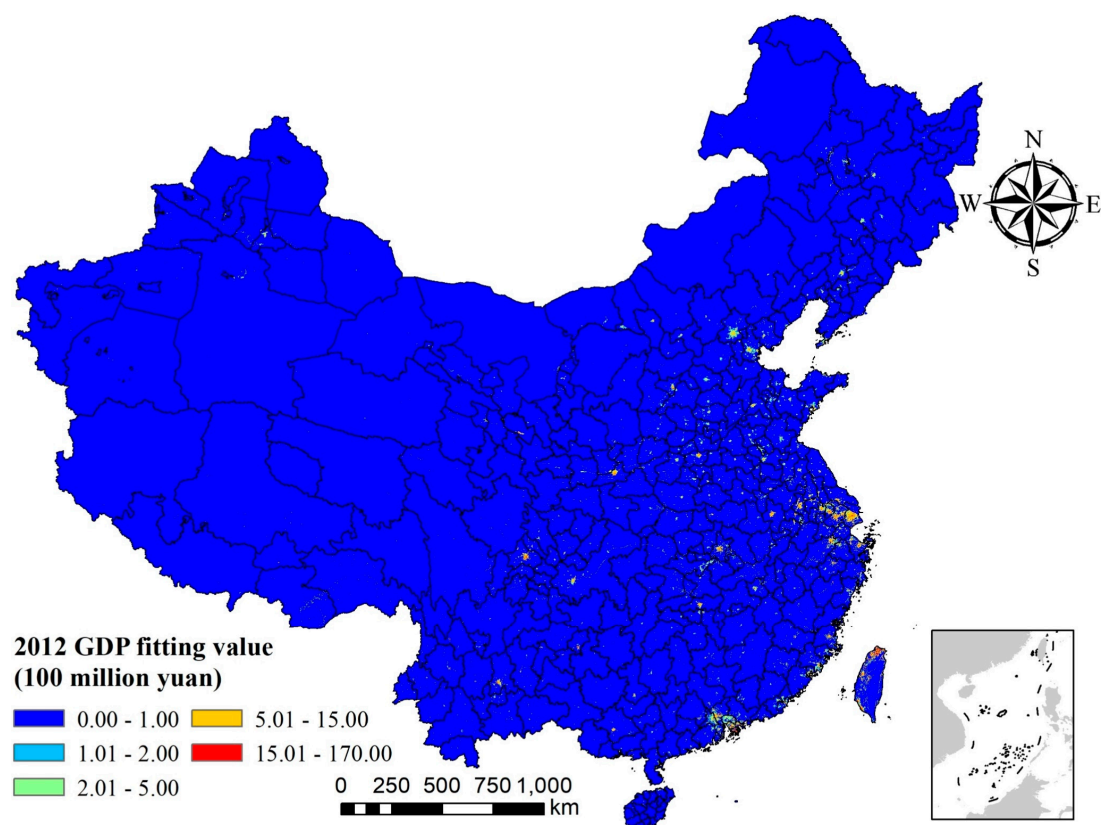

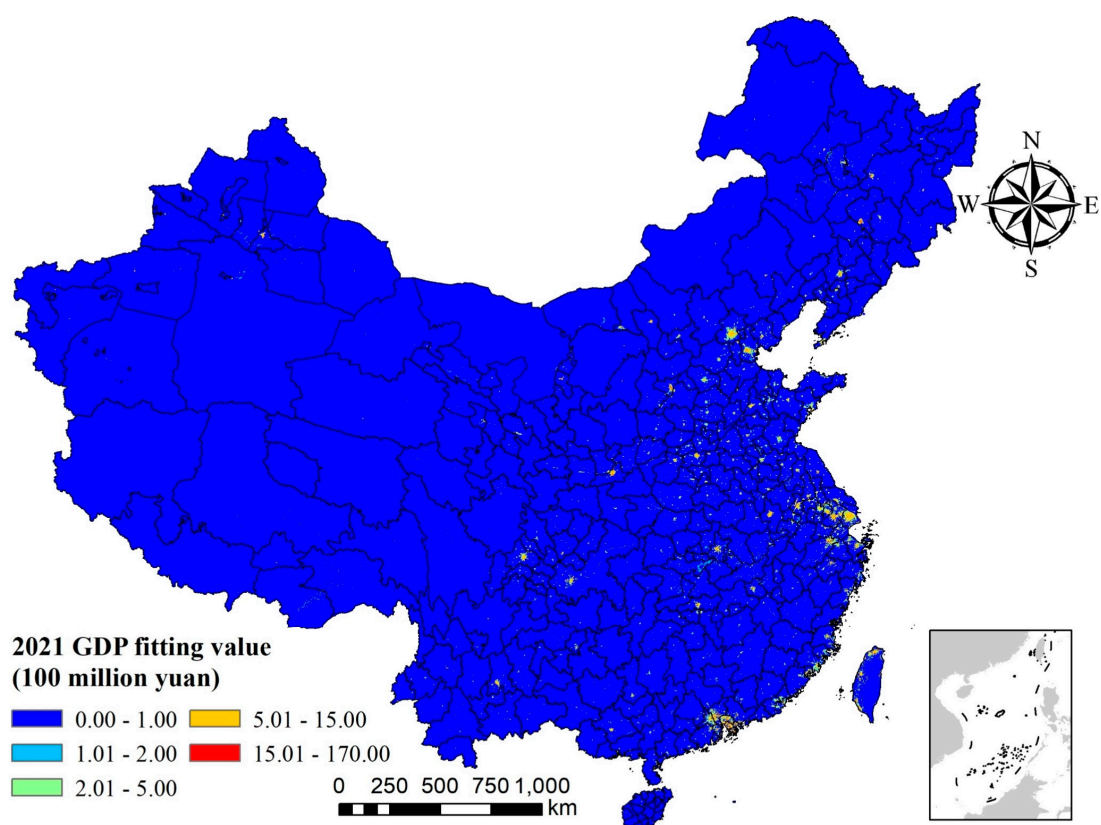

**Figure S1. Fitted value of our 1-kilometer GDP in 2012 and 2021.**

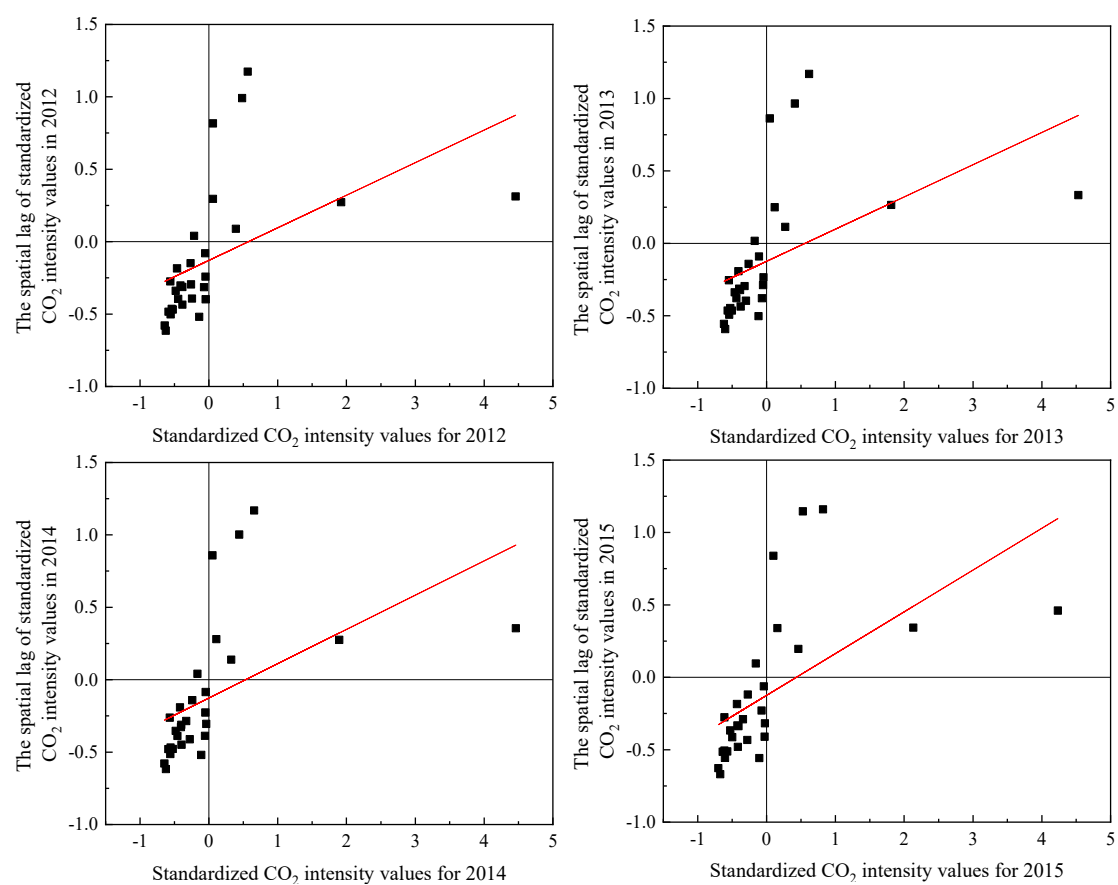

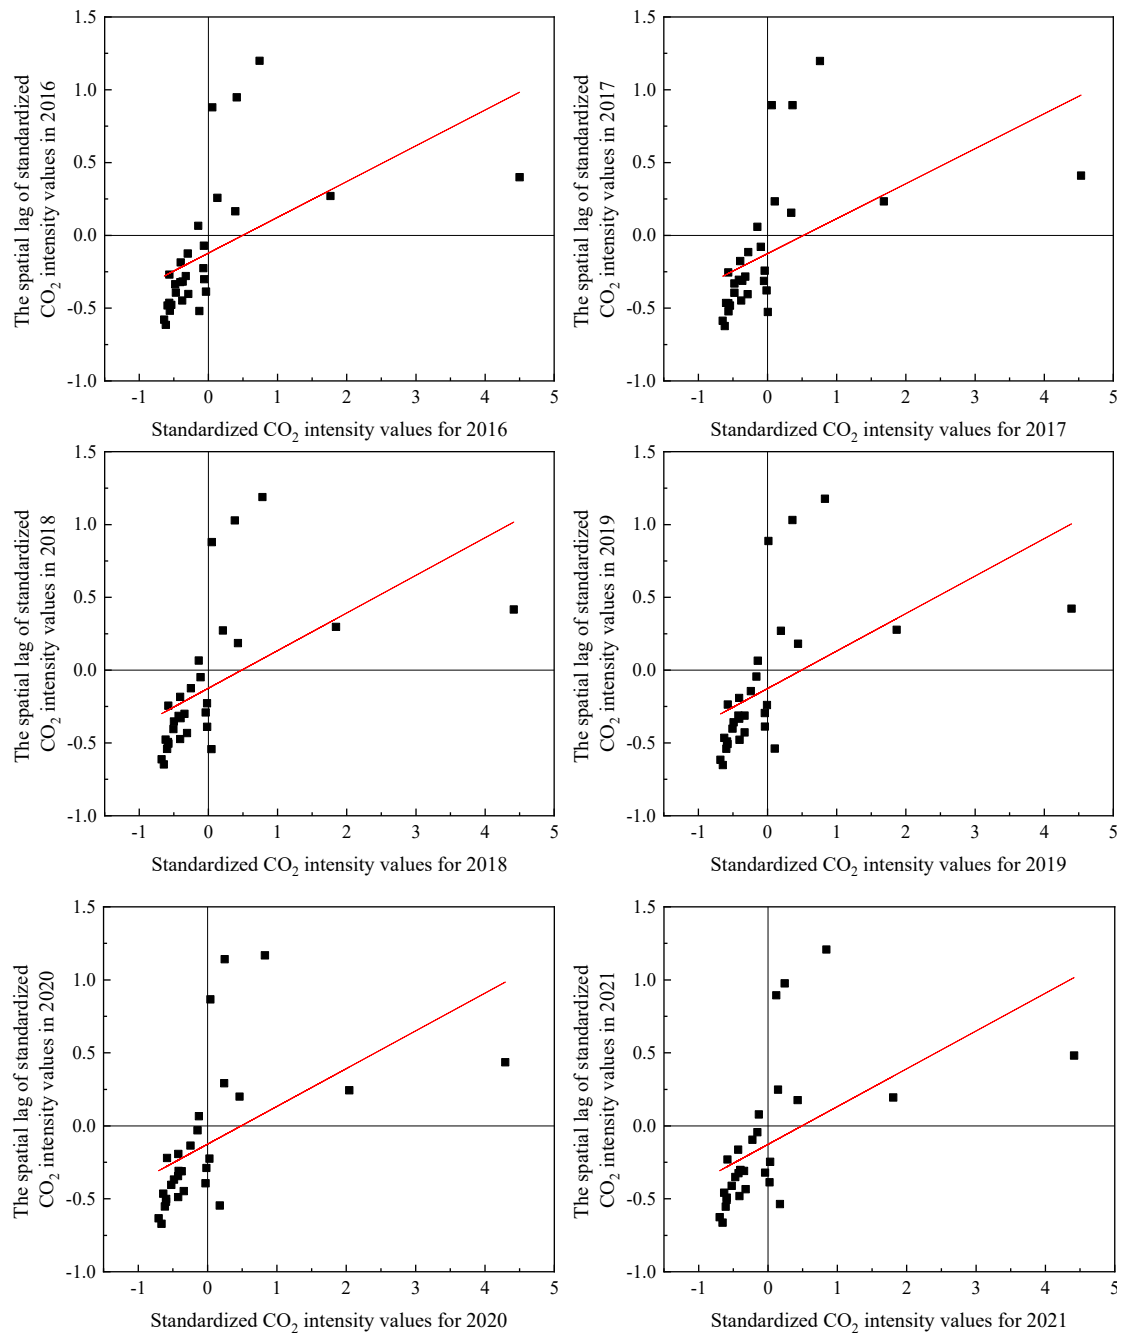

**Figure S2. Moran scatterplot of provincial scale carbon emissions.**

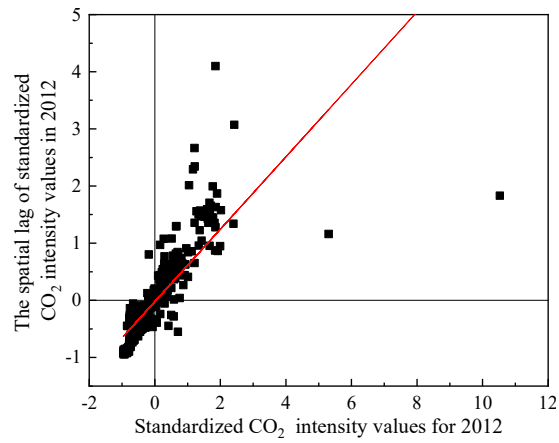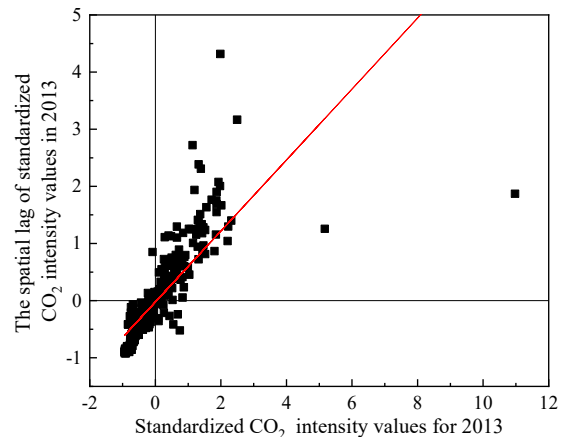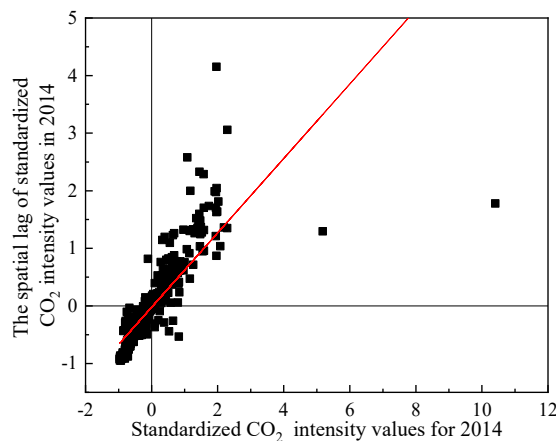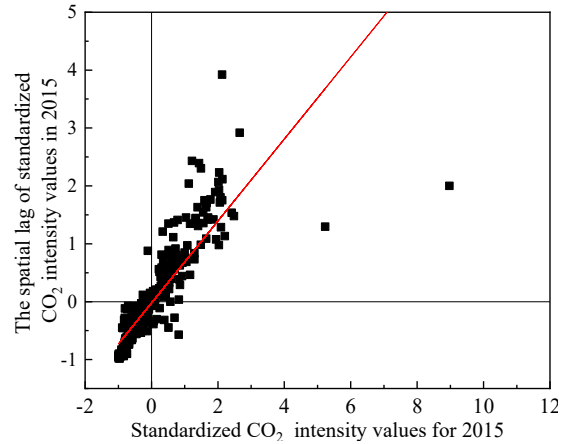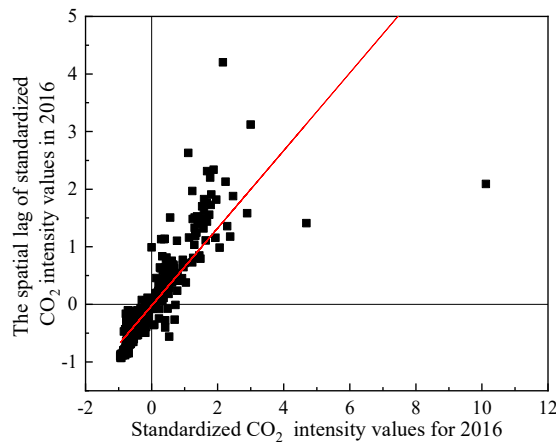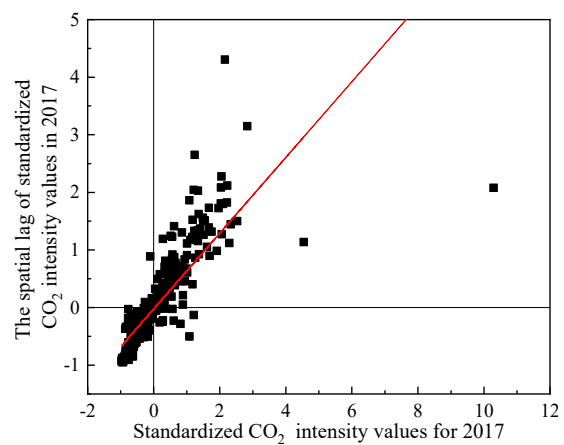

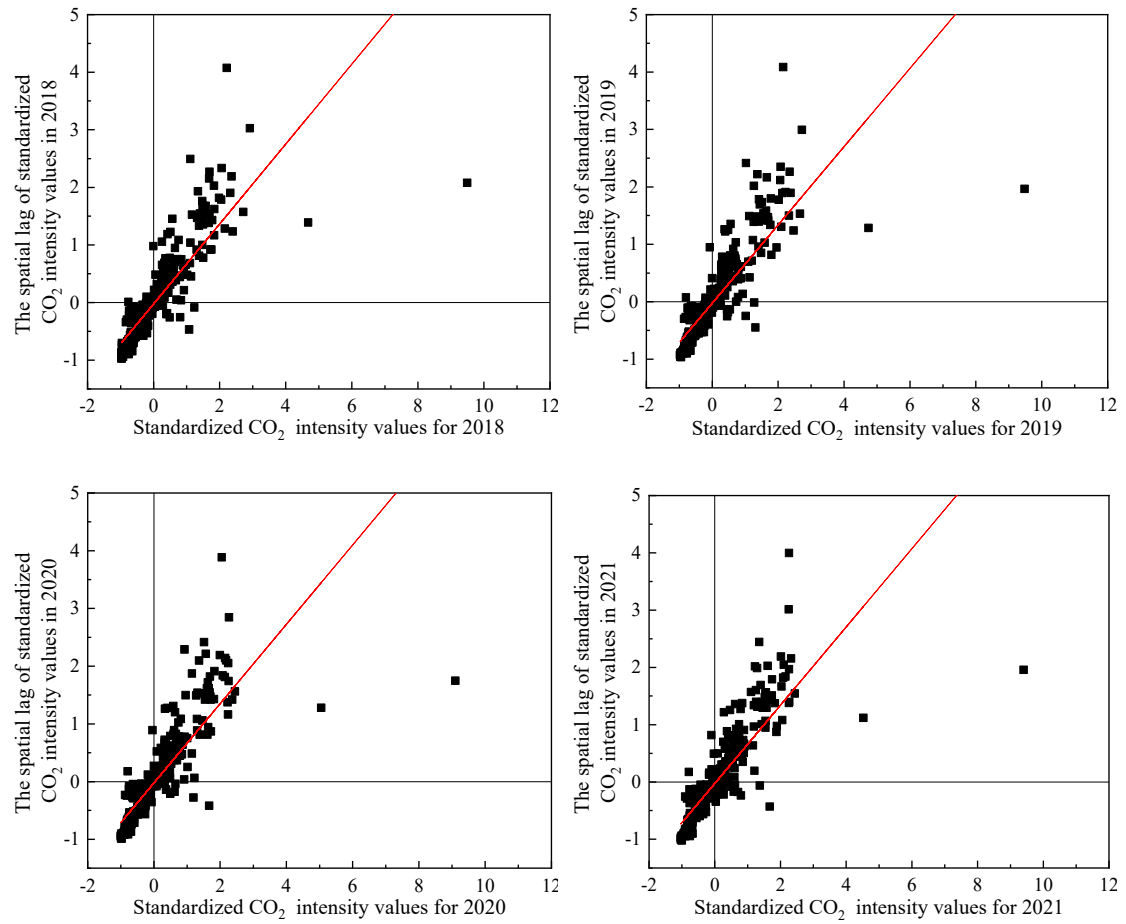

**Figure S3. Moran scatterplot of carbon emissions at municipal scale.**
